CORRECTION

# Correction: Surface-Based fMRI-Driven Diffusion Tractography in the Presence of Significant Brain Pathology: A Study Linking Structure and Function in Cerebral Palsy

Lee B. Reid, Ross Cunningham, Roslyn N. Boyd, Stephen E. Rose

Fig 7 appears incorrectly in the published article. Please see the correct [Fig 7](#) and its caption [here](#).

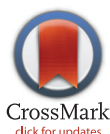

## OPEN ACCESS

**Citation:** Reid LB, Cunningham R, Boyd RN, Rose SE (2016) Correction: Surface-Based fMRI-Driven Diffusion Tractography in the Presence of Significant Brain Pathology: A Study Linking Structure and Function in Cerebral Palsy. PLoS ONE 11(8): e0162271. doi:10.1371/journal.pone.0162271

**Published:** August 30, 2016

**Copyright:** © 2016 Reid et al. This is an open access article distributed under the terms of the [Creative Commons Attribution License](#), which permits unrestricted use, distribution, and reproduction in any medium, provided the original author and source are credited.

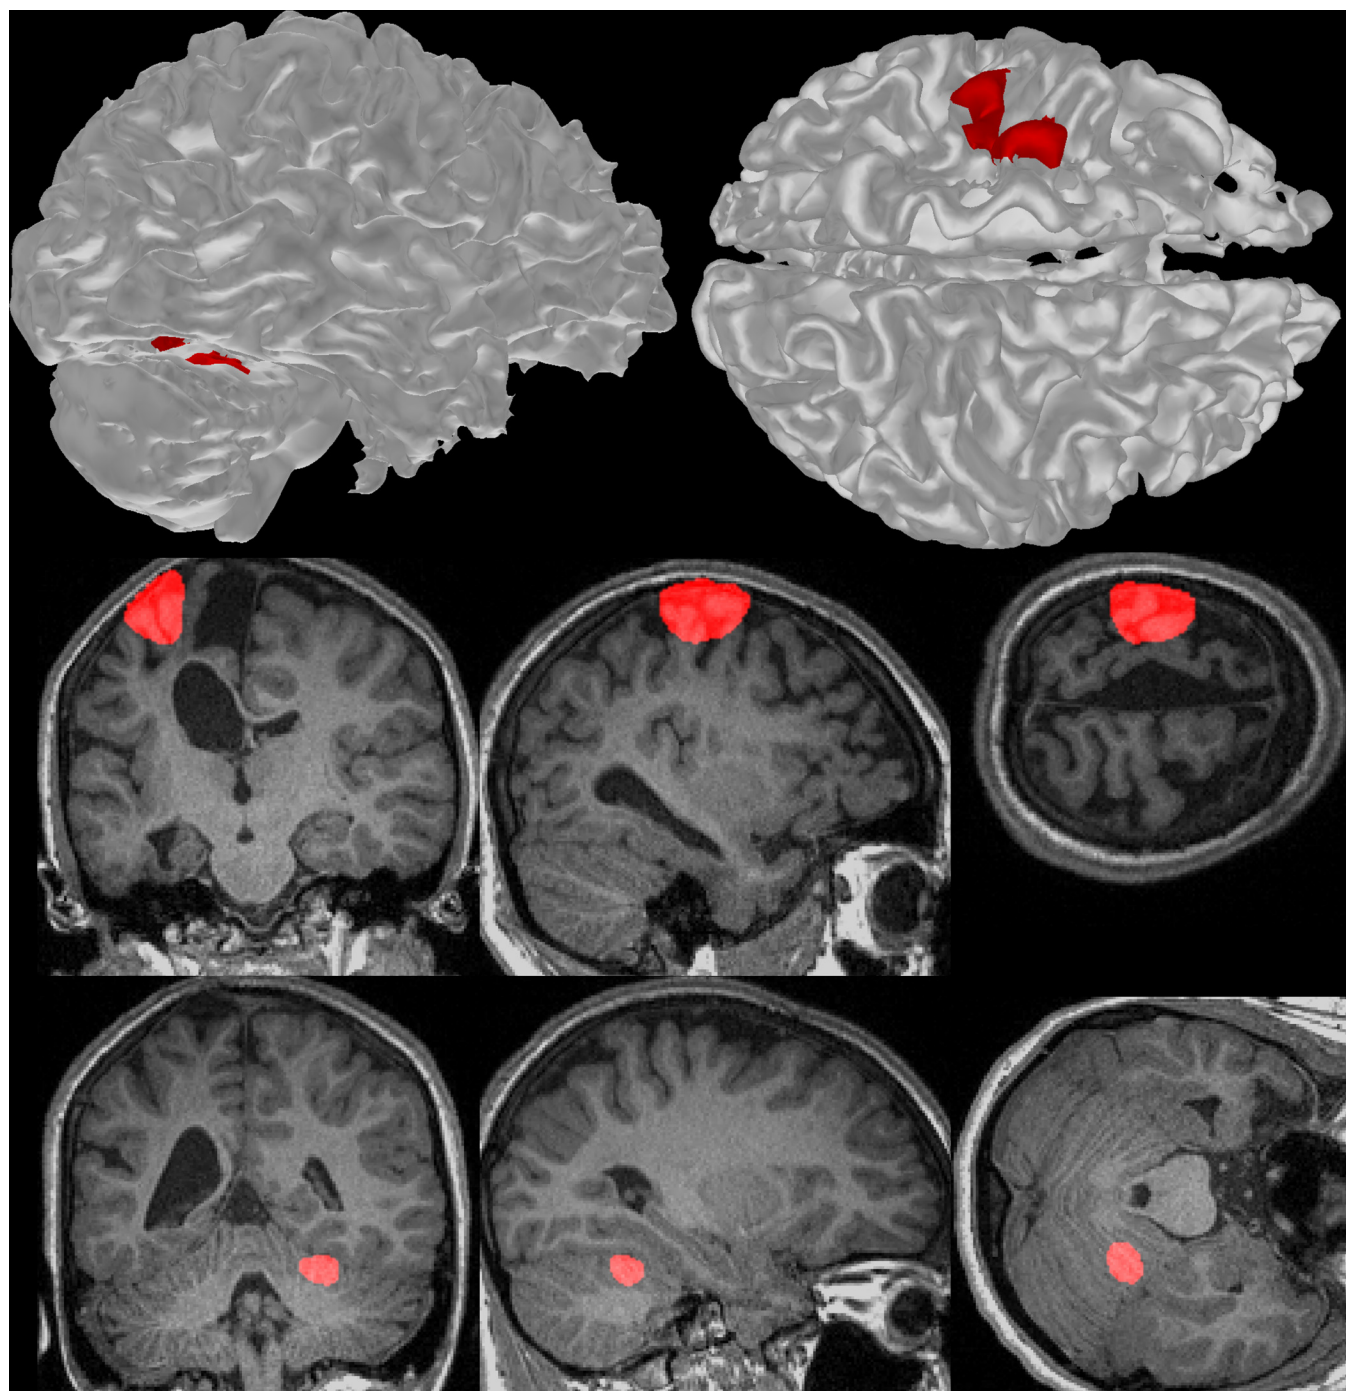

**Fig 7. Typical significant fMRI activation detected through surface (top row) and voxelwise (middle and bottom rows) methods for tapping of the 'impaired' hand in a single participant.** The middle and bottom rows show coronal, sagittal, and right-facing axial sections in the left, middle, and right columns respectively. Both methods show activation (red) in the approximate pre- and post-central gyri of the left hemisphere, and the right anterior lobe of the cerebellum. The voxelwise analysis resulted in approximately oval shaped activations that include grey-matter, white-matter, and cerebrospinal fluid. The surface-based method resulted in less-uniformly shaped activation patterns and two activation sites on the cerebellum.

doi:10.1371/journal.pone.0162271.g001

## Reference

1. Reid LB, Cunnington R, Boyd RN, Rose SE (2016) Surface-Based fMRI-Driven Diffusion Tractography in the Presence of Significant Brain Pathology: A Study Linking Structure and Function in Cerebral Palsy. PLoS ONE 11(8): e0159540. doi:[10.1371/journal.pone.0159540](https://doi.org/10.1371/journal.pone.0159540) PMID: [27487011](https://pubmed.ncbi.nlm.nih.gov/27487011/)
